# Supplementary material
Source: Springer Nature journal article supplement (https://www.springermedizin.de/resource/supplementary/13256_2009_1057_MOESM2_ESM.pdf/9647722)

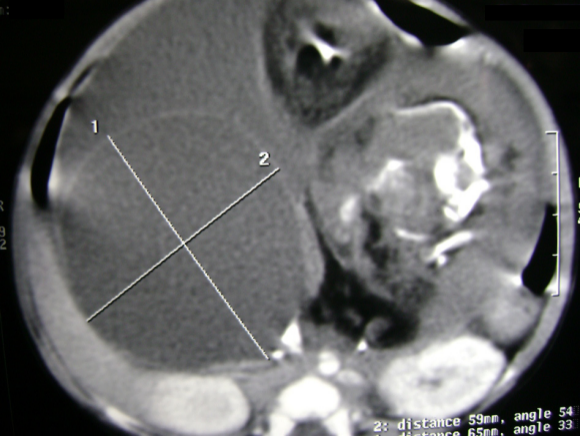

1

2

2: distance 59mm, angle 54  
distance 65mm, angle 33

Supplement: MOESM2 [file 9647722]
